# Supplementary material
Source: PubMed Central journal article supplement (PMC4678048)
Supplement: 10-1055-s-0035-1558172-sup_gf971.pdf [file 10-1055-s-0035-1558172-sup_gf971.pdf]

# Messung des Magenumfangs bei Feten mit Ösophagusatresie

## Measurement of Gastric Circumference in Foetuses with Oesophageal Atresia

### Autoren

M. Hoopmann<sup>1</sup>, K. O. Kagan<sup>1</sup>, F. Borgmeier<sup>1</sup>, G. Seitz<sup>2</sup>, J. Arand<sup>3</sup>, P. Wagner<sup>1</sup>

### Institute

<sup>1</sup> Department of Obstetrics and Gynecology, University of Tübingen, Tübingen

<sup>2</sup> Department of Pediatric Surgery and Urology, University Children's Hospital, Tübingen

<sup>3</sup> Department of Neonatology, University Children's Hospital, Tübingen

### Schlüsselwörter

- Magenumfang
- Ösophagusatresie
- tracheoösophageale Fistel

### Key words

- gastric circumference
- oesophageal atresia
- tracheo-oesophageal fistula

### Zusammenfassung

**Fragestellung:** Die gezielte Erkennung einer fetalen Ösophagusatresie (ÖA) mit oder ohne tracheale Fisteln stellt eine diagnostische Herausforderung für die Pränatalmedizin dar. Ziel der vorliegenden Arbeit war es, den Stellenwert der Messung des Magenumfangs für die Diagnostik dieser bedeutsamen Fehlbildung zu analysieren.

**Material und Methodik:** Insgesamt wurden die Untersuchungen von 433 Schwangerschaften zwischen der 18,4 bis 39,1 Schwangerschaftswoche retrospektiv ausgewertet. 59 dieser Feten wiesen eine ÖA auf. Mittels linearer Regressionsanalyse wurden bei normalen Feten signifikante Einflussparameter auf den Magenumfang untersucht. Anschließend erfolgte die Umwandlung der Magenumfänge in z-Werte und der Vergleich zwischen den ÖA mit und ohne Fistel mit der Normalpopulation mithilfe eines t-Tests.

**Ergebnisse:** Bei den normalen Feten zeigte sich eine signifikante Assoziation zwischen dem Umfang des Magens und dem Abdomenumfang (Umfang =  $6,809 + 0,179 \times \text{Abdomenumfang}$ ,  $r = 0,686$ ,  $p < 0,0001$ ). Der mittlere Magenumfang lag in der normalen Gruppe bei 43,0 (Standardabweichung [STW] 13,7) mm und bei Feten mit und ohne Fistel bei 33,8 (STW 22,7) und 0,9 (STW 3,7) mm. Bei 34 (57,6%) Feten mit einer ÖA lag der Magenumfang  $< 5$ er-Perzentile. Im Einzelnen waren es 13 (34,2%) Feten mit einer Fistel und 21 (100%) ohne Fistel. Die mittleren z-Werte in der normalen Gruppe und in der Gruppe der ÖA mit Fistel und ohne Fistel lagen bei 0,0 (STW 1,0), -1,3 (STW 2,2) und -4,5 (STW 1,0).

**Schlussfolgerung:** Messungen des Magenumfangs  $< 5$ er-Perzentile sollten eine weiterführende Diagnostik nach sich ziehen. Während ÖA ohne Fisteln hierbei stets auffällig werden, weist nur ungefähr jede 3. ÖA mit Fistel einen signifikant verkleinerten Magen auf.

### Abstract

**Background:** The specific recognition of oesophageal atresia (OA) with or without a tracheal fistula in a foetus is a diagnostic challenge for prenatal medicine. The aim of the present work is to analyse the value of the measurement of gastric size in the diagnosis of this significant malformation.

**Materials and Methods:** Altogether, the examinations of 433 pregnancies between the 18.4 and 39.1 weeks of gestation were retrospectively analysed. 59 of these foetuses exhibited an OA. By means of a linear regression analysis with normal foetuses, significant parameters influencing gastric size were examined. Subsequently the gastric sizes were transformed into z values and a comparison was made between OA with and without fistulae with the help of t tests.

**Results:** In the normal foetuses there was a significant association between the gastric circumference and the abdominal circumference (circumference =  $6.809 + 0.179 \times \text{abdominal circumference}$ ,  $r = 0.686$ ,  $p < 0.0001$ ). In the normal group the average was 43.0 (standard deviation [SD] 13.7) mm and those in foetuses with and without fistulae were 33.8 (SD 22.7) and 0.9 (SD 3.7) mm. In 34 (57.6%) foetuses with an OA, the gastric circumference was below the 5th percentile. In detail, there were 13 (34.2%) foetuses with a fistula and 21 (100%) without a fistula. The average z values in the normal group and in the groups of OA with fistula and without fistula amounted to 0.0 (SD 1.0), -1.3 (SD 2.2) and -4.5 (SD 1.0).

**Conclusion:** Measurements of the gastric circumference below the 5th percentile should lead to further diagnostic measures, especially when associated with polyhydramnios. Although OA without a fistula is always conspicuous, only about one in three OAs with fistula are associated with a significantly smaller stomach.

eingereicht 18. 7. 2015

revidiert 23. 8. 2015

akzeptiert 25. 8. 2015

### Bibliografie

**DOI** <http://dx.doi.org/10.1055/s-0035-1558172>  
Geburtsh Frauenheilk 2015; 75: 1-5 © Georg Thieme Verlag KG Stuttgart · New York · ISSN 0016-5751

### Korrespondenzadresse

**PD Dr. Markus Hoopmann**  
University of Tübingen  
Department of Obstetrics  
and Gynecology  
Calwer Straße 7  
72076 Tübingen  
MHoopmann@gmx.de

## Einleitung

Während der 5. bis 6. Woche der Embryonalentwicklung trennen sich der Ösophagus und die Trachea aus einer gemeinsamen Anlage innerhalb des frühen Darmrohrs. Eine unvollständige Separation führt zu der angeborenen Fehlbildung der Ösophagusatresie (ÖA). In der Mehrheit der Fälle (72–90%) findet sich hierbei eine Beteiligung der Trachea in Form einer tracheoösophagealen Fistel zwischen dem unteren Anteil der Trachea und dem Ösophagus. Die Prävalenz weist regionale Variabilitäten auf und ist durchschnittlich auf 2,43 bis 2,86 pro 10000 Geburten einzuschätzen [1–3]. Ein großer Anteil der betroffenen Kinder weist weitere Fehlbildungen oder Syndrome auf (wie z. B. VACTERL-Assoziation, Trisomie 18, CHARGE-Syndrom). Die häufigste assoziierte Fehlbildung ist der angeborene Herzfehler. In aktuellen Berichten des EUROCAT-Registers finden sich nur 44,7% der Fälle als isolierte Befunde [1]. Neben den assoziierten Fehlbildungen stellt die regelhafte Frühgeburtlichkeit einen bedeutsamen Prognosefaktor dar. Aufgrund des häufigen Auftretens eines Polyhydramnions kommt es in 38,5% der Fälle zu einer vorzeitigen Entbindung [1, 4, 5]. Überlebensraten dürfen in isolierten Fällen mit adäquater perinataler und kinderchirurgischer Versorgung bei fast 100% erwartet werden [6–8]. Spätere Komplikationen und Morbiditäten während der Kindheit sind Schluckbeschwerden aufgrund von Anastomosenengen oder einem gastroösophagealen Reflux sowie rezidivierende Infektionen [9–11].

Die aktuelle Datenlage ist widersprüchlich bez. des Benefits der betroffenen Neugeborenen durch die pränatale Diagnosestellung. Während bspw. Brantberg und Mitarbeiter ein signifikant verbessertes Survival (100 vs. 73%) bei vorgeburtlich bekannten Fällen zeigen konnten, finden andere Arbeitsgruppen eine schlechtere Prognose in dieser Gruppe [12, 13]. Letzteres ist durch die Überrepräsentation von ÖA ohne Fistel und assoziierten Fehlbildungen in der pränatal detektierten Gruppe zu erklären. Aktuelle Arbeitsgruppen sind sich jedoch einig, dass in der Möglichkeit der vorgeburtlichen Beratung der Eltern und Reduktion postpartaler Verlegungen durch die pränatale Diagnose ein Benefit gesehen werden muss [14].

Die bisherige Detektionsrate innerhalb Europas variiert zwischen unter 10% bis zu 50% (im Durchschnitt 36,5%) [1, 15]. Die sonografische Visualisierung des Ösophagus stellt auch moderne Ultraschallgeräte an die Grenzen des Auflösungsvermögens. In Fällen ohne Fistel führt die fehlende Darstellbarkeit der Magenfüllung zur Diagnosestellung [16]. Fälle mit Fisteln werden seltener vorgeburtlich erkannt. Ein kleiner Magen wird zwar von vielen Arbeitsgruppen als Hinweiszeichen beschrieben, allerdings fehlt zumeist ein objektivierbarer Grenzwert für die Magengröße [13]. Das Ziel unserer vorliegenden Studie war es, die Magengröße als potenzielles Diagnosekriterium bei Feten mit ÖA sowohl mit als auch ohne tracheoösophageale Fistel zu untersuchen.

## Material und Methodik

Die zugrunde liegenden Untersuchungen wurden im Bereich für Pränatalmedizin der Universitätsfrauenklinik Tübingen retrospektiv erhoben.

## Messmethodik

Zum einen wurden aus routinemäßig durchgeführten Biometrien digital gespeicherte Bilder der Abdomenumfangsmessung untersucht. Voraussetzung war eine saubere Darstellung der ana-

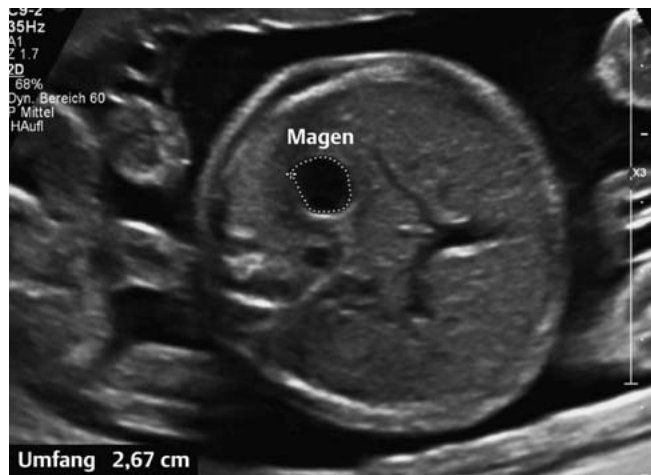

**Abb. 1** Darstellung der Magenumfangsmessung mittels manueller Tracings in der Biometrieebene des Abdomenumfangs.

tomischen Landmarken: Wirbelsäulenquerschnitt, parallel angeschnittenes Rippenpaar, der gefüllte Magen und der proximale Anteil der V. umbilicalis im Übergang zum Ductus venosus und zur rechten Portalvene. Die Magenfüllung wurde stets in der Biometrieebene vermessen. Hierzu wurde mittels der manuellen Tracing-Funktion der Magenumfang anhand der digital gespeicherten Bilder grafisch ermittelt (► **Abb. 1**).

## Kollektiv

Zur Erhebung der Normwerte des Umfangs wurden 374 normal verlaufene Einlingsschwangerschaften berücksichtigt. Das Testkollektiv setzte sich aus 59 Schwangerschaften mit Nachweis einer ÖA zusammen.

Bei den Schwangerschaften mit auffälligem Feten wurde jeweils die erste Untersuchung berücksichtigt, die an der Unifrauenklinik Tübingen durchgeführt wurde.

## Erhebung assoziierter Einflussfaktoren

Neben dem Magenumfang wurden der Kopfumfang, der Abdomenumfang, die Femurlänge sowie das Gestationsalter zum Zeitpunkt der Untersuchung erfasst. Weiterhin wurde das Vorliegen eines Polyhydramnions, definiert als größtes vertikales Fruchtwasserdepot über 8 cm, sowie die Durchführung von Entlastungsdrainagen registriert.

## Statistische Analyse

Mittels linearer Regressionsanalyse wurden bei normalen Feten signifikante Einflussparameter auf den Magenumfang untersucht. Anschließend erfolgten die Umwandlung der Magenumfänge in z-Werte und der Vergleich zwischen den ÖA mit und ohne Fistel mit der Normalpopulation mithilfe eines t-Tests. Unterschiede wurden ab einem p-Wert < 0,05 als signifikant eingestuft.

Die Ergebnisse werden als Median (Range) oder Mittelwert (Standardabweichung STW) angegeben.

## Ethikvotum

Aufgrund der retrospektiven, anonymisierten Auswertung innerhalb der Studie war eine Anerkennung durch die örtliche Ethik-Kommission nicht obligat. Nichtsdestotrotz wurde die Ethikkom-

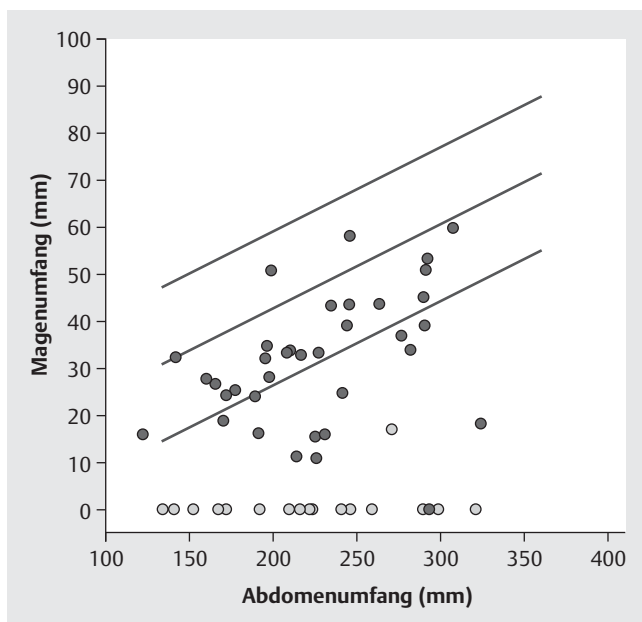

**Abb. 2** Grafische Darstellung der Normalverteilung der Magenumfänge in Abhängigkeit von dem Abdomenumfang inklusive der 5er- und 95er-Perzentile. Die Punkte geben die Magenumfangswerte der Feten mit ÖA wieder (dunkelgrauer Punkt mit Fistel, hellgrauer Punkt ohne Fistel).

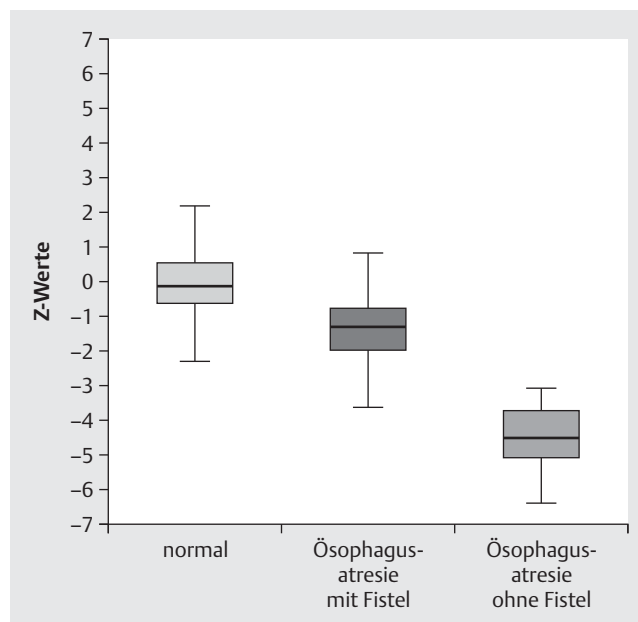

**Abb. 3** Boxplots der z-Werte der Magenumfänge im Normalkollektiv, bei Feten mit ÖA mit Fistel und bei Feten mit ÖA ohne Fistel.

mission über das Projekt informiert (Projektnummer: 597/2015R).

## Ergebnisse

### Charakteristika der eingeschlossenen Schwangerschaften

Insgesamt wurden 433 Patientinnen in der Auswertung berücksichtigt. Das mediane Gewicht der Patientinnen lag bei 62,3 kg (Bereich 45,0–163,0 kg). Das mediane Gestationsalter betrug 23,3 SSW (Bereich 18 + 2–39 + 1 SSW), wobei 261 (60,3%) vor 26 + 0 SSW und 172 (39,7%) danach gesehen wurden.

### Verteilung der Feten mit Ösophagusatresie und der Magengröße

Bei 59 (13,7%) der 433 Feten lag eine ÖA vor. Davon hatten 38 (64,4%) Feten eine ÖA mit und 21 (35,6%) ohne tracheoösophageale Fistel. 20 (33,9%) Feten hatten eine Chromosomenstörung, dabei lag der Anteil in der Gruppe der ÖAs mit und ohne Fistel bei 23,7 und 52,4%. 14 (36,8%) Feten mit einer ÖA mit Fistel hatten ein Polyhydramnion. In der Gruppe der Feten mit ÖA ohne Fistel wurde bei 12 (57,1%) ein Polyhydramnion diagnostiziert.

Bei 21 Feten konnte während des gesamten Untersuchungsintervalls kein Magen gesehen werden. Davon hatten 20 (95,2%) eine ÖA ohne Fistel. In diesen Fällen wurde ein Magenumfang von 0,1 mm angesetzt. Der mittlere Magenumfang lag in der normalen Gruppe bei 43,0 (STW 13,7) mm und bei Feten mit und ohne Fistel bei 33,8 (STW 22,7) und 0,9 (STW 3,7) mm.

### Assoziation der Magengröße zu anderen Faktoren

Bei den normalen Feten zeigte sich eine signifikante Assoziation zwischen dem Umfang des Magens und dem Abdomenumfang (Umfang =  $6,809 + 0,179 \times \text{Abdomenumfang}$ ,  $r = 0,686$ ,  $p < 0,0001$ ).

Es wurde zudem eine signifikante Korrelation zum Gestationsalter ( $r = 0,669$ ,  $p < 0,0001$ ), zum Kopfumfang ( $r = 0,659$ ,  $p < 0,0001$ ) und zur Femurlänge ( $r = 0,671$ ,  $p < 0,001$ ) beobachtet. Für die weitere Analyse wurde die Assoziation zum Abdomenumfang verwendet.

### Perzentilen und z-Werte

Bei 18 (4,8%) der 374 normalen Patientinnen lag der Magenumfang unter der 5. Perzentile. Im Gegensatz traf dies bei 34 (57,6%) Feten mit einer ÖA zu. Im Einzelnen waren es 13 (34,2%) Feten mit einer Fistel und 21 (100%) ohne Fistel (Abb. 2).

Die mittleren z-Werte in der normalen Gruppe und in der Gruppe der ÖA mit Fistel und ohne Fistel lagen bei 0,0 (STW 1,0), -1,3 (STW 2,2) und -4,5 (STW 1,0) (t-Test: ÖA mit Fistel vs. normal  $p = 0,001$ ; t-Test: ÖA ohne Fistel vs. normal  $p < 0,0001$ ; t-Test: ÖA mit vs. ohne Fistel  $p < 0,0001$ ) (Abb. 3).

## Diskussion

Die vorliegende Studie konnte nachweisen, dass die durchschnittliche Magengröße gemessen als Magenumfang auf der abdominalen Biometrieebene bei Feten mit ÖA sowohl mit als auch ohne Fistel vermindert ist. In allen Fällen ohne Fistel fand sich vollständig oder nahezu vollständig leerer Magen. Die Kombination eines nicht darstellbaren oder sehr kleinen Magens mit einem Polyhydramnion ist ein bekanntes Hinweiszeichen für das Vorliegen einer ösophagealen Obstruktion [15, 17, 18]. Zu berücksichtigen sind hierbei erhebliche Falsch-Positiv-Raten und die oft subjektive Beurteilung der Magenfüllung [4, 19]. Bemühungen, die vorgeburtliche Detektionsrate zu verbessern, konzentrierten sich auf die vorgeburtliche Visualisierung des ösophagealen Pouch Signs, das durch die Dilatation des blind endenden proximalen Segments des Ösophagus entsteht [20, 21]. Aber

die meisten Fälle der ÖA lassen diesen pathognomischen Blind-sack aufgrund einer Fistel vermissen. Zudem kann das Pouch Sign auch bei strukturell unauffälligen Feten als vorübergehende temporäre Erscheinung gefunden werden, sodass falsch positive Befunde erhoben werden [22].

Das Kernproblem stellt die Erkennung der Mehrheit der ÖA mit Fistel dar. Die Beeinträchtigung des fetalen Schluckakts hängt in diesen Fällen von dem Lumen der tracheoösophagealen Fistel ab. Bei großen Fisteln kann sogar das Auftreten eines Polyhydramnions fehlen. Die Sensitivität der Polyhydramnie alleine liegt in einigen Studien nur bei 73% [13]. In Kombination mit dem Kriterium des kleinen Magens kann zumindest ein positiv prädiktiver Wert von bis zu 67% erwartet werden [13]. In unserem Kollektiv fiel eine vergleichsweise niedrige Rate an Polyhydramnien auf. Lediglich 36,8% der Feten mit einer ÖA mit Fistel und 57,1% der Feten ohne Fistel wiesen ein Polyhydramnion auf. Ursachen hierfür liegen im hohen Anteil von 33,9% an schwerwiegenden Chromosomenstörungen, die meist zu einer frühzeitigen Schwangerschaftsbeendigung geführt haben, und der stärkeren Gewichtung auf das II. Trimenon. Das Polyhydramnion entwickelt sich im Laufe der Schwangerschaft zu immer stärkerer Ausprägung und ist daher meist erst im III. Trimenon in eindeutiger Weise zu finden. In vielen Studien erfolgte die Einschätzung der Magenfüllung rein subjektiv. Sinnvoller erscheint hier eine objektive Vermessung mittels eines standardisierten Magenumfangs. Mit der aktuellen Studie konnten wir zeigen, dass die Magenfüllung in zumindest 36,8% der betroffenen Feten mit Fistel unterhalb der 5er-Perzentile lag. Folglich kann der Nachweis eines kleinen Magens eine detaillierte weitere Diagnostik veranlassen.

Die direkte Visualisierung des Ösophagus mittels hochauflösenden 2-D- oder 3-D-Ultraschalls wie auch in der Kernspintomografie ist äußerst schwierig und zeitaufwendig [23, 24]. In einzelnen Kasuistiken konnte die direkte pränatale Darstellung durch Konzentration auf das anatomische Gebiet zwischen der Aorta und der Trachea nachgewiesen werden [25]. Gelingt der Nachweis eines Pouch Signs, so ist der positive prädiktive Wert als hoch einzuschätzen. In einigen Studien liegt der Wert sowohl für die Sonografie wie auch das fetale MRT bei 100%, andere Arbeiten verwiesen jedoch auch auf mögliche falsch positive Befunde [19, 22, 26]. Dies zeigt, dass eine detaillierte sonografische Untersuchung des Ösophagus zwar technisch möglich ist, aber nicht in einem unselektierten Routinescreening angeboten werden kann. Die Messung der Magenfüllung könnte hier hilfreich sein, da ein kleiner Magen eine Risikogruppe definieren kann, welche eine detaillierte Untersuchung des Ösophagus benötigt.

Eine weitere Verbesserung der Diagnostik könnte in der Anwendung der 3-D-Sonografie erwartet werden [27]. Allerdings ist die Anwendung der publizierten Normalwerte der 3-dimensionalen Biometrie zurzeit durch große Diskrepanzen und eine fehlende methodische Standardisierung limitiert [28].

In neueren Studien wird auch der Ansatz der biochemischen Analyse des Fruchtwassers beschrieben. Hierbei werden unveränderte Werte bez. der L-Leucin-Amnioproteidase (AMP) und erhöhte Konzentrationen an Alpha-Fetoprotein (AFP) und Gamma-Glutamyl-Transpeptidase (GGT) erwartet, sodass insbesondere der Quotient aus beiden Konzentrationen in ersten Studien sehr gute Sensitivitäten und Spezifitäten aufweist (98%/100%) [29, 30]. Die bisherigen Studien beruhen allerdings noch auf sehr kleinen Fallzahlen und bedürfen einer Bestätigung in größeren Studien. Des Weiteren ist es aufgrund der Invasivität und dem damit verbundenen Eingriffsrisiko kein Screeningverfahren.

Eine Einschränkung der vorliegenden Arbeit ist der retrospektive Charakter und die damit verbundene fehlende Berücksichtigung der Dynamik der Magenfüllung. Diese ist nicht konstant und unterliegt Schluckzyklen des Feten [31]. Allerdings galt diese Einschränkung für alle eingeschlossenen Schwangerschaften und somit gleichmäßig für die registrierte Magenfüllung der betroffenen Feten wie auch denen der Normalpopulation.

## Fazit für die Praxis

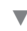

Die Magenfüllung bei Feten mit ÖA ist in Fällen mit vollständiger Unterbrechung des Ösophagus reduziert. Wir konnten zeigen, dass eine reduzierte Magenfüllung unterhalb der 5er-Perzentile auch in 36,8% der Feten mit tracheoösophagealer Fistel gefunden werden kann. Folglich kann die Messung der Magenfüllung eine Risikogruppe für die Durchführung einer ausgiebigen weiterführenden Diagnostik des Ösophagus definieren.

## Interessenkonflikt

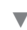

Nein.

## Literatur

- 1 Pedersen RN, Calzolari E, Husby S et al. Oesophageal atresia: prevalence, prenatal diagnosis and associated anomalies in 23 European regions. *Arch Dis Child* 2012; 97: 227–232
- 2 Depaepel A, Dolk H, Lechat MF. The epidemiology of tracheo-oesophageal fistula and oesophageal atresia in Europe. EUROCAT Working Group. *Arch Dis Child* 1993; 68: 743–748
- 3 Forrester MB, Merz RD. Epidemiology of oesophageal atresia and tracheo-oesophageal fistula in Hawaii, 1986–2000. *Public Health* 2005; 119: 483–488
- 4 Abele H, Starz S, Hoopmann M et al. Idiopathic polyhydramnios and postnatal abnormalities. *Fetal Diagn Ther* 2012; 32: 251–255
- 5 de Jong EM, de Haan MA, Gischler SJ et al. Pre- and postnatal diagnosis and outcome of fetuses and neonates with esophageal atresia and tracheoesophageal fistula. *Prenat Diagn* 2010; 30: 274–279
- 6 Deurloo JA, Ekkelkamp S, Schoorl M et al. Esophageal atresia: Historical evolution of management and results in 371 patients. *Ann Thorac Surg* 2002; 73: 267–272
- 7 Konkin DE, O'hali WA, Webber EM et al. Outcomes in esophageal atresia and tracheoesophageal fistula. *J Pediatr Surg* 2003; 38: 1726–1729
- 8 Lilja HE, Wester T. Outcome in neonates with esophageal atresia treated over the last 20 years. *Pediatr Surg Int* 2008; 24: 531–536
- 9 Little DC, Rescorla FJ, Grosfeld JL et al. Long-term analysis of children with esophageal atresia and tracheoesophageal fistula. *J Pediatr Surg* 2003; 38: 852–856
- 10 Chetcuti P, Phelan PD. Gastrointestinal morbidity and growth after repair of oesophageal atresia and tracheo-oesophageal fistula. *Arch Dis Child* 1993; 68: 163–166
- 11 Chetcuti P, Phelan PD. Respiratory morbidity after repair of oesophageal atresia and tracheo-oesophageal fistula. *Arch Dis Child* 1993; 68: 167–170
- 12 Brantberg A, Blaas HG, Haugen SE et al. Esophageal obstruction-prenatal detection rate and outcome. *Ultrasound Obstet Gynecol* 2007; 30: 180–187
- 13 Kunisaki SM, Bruch SW, Hirschl RB et al. The diagnosis of fetal esophageal atresia and its implications on perinatal outcome. *Pediatr Surg Int* 2014; 30: 971–977
- 14 Garabedian C, Sfeir R, Langlois C et al. Does prenatal diagnosis modify neonatal treatment and early outcome of children with esophageal atresia? *Am J Obstet Gynecol* 2015; 212: 340.e1–340.e7
- 15 Houben CH, Curry JL. Current status of prenatal diagnosis, operative management and outcome of esophageal atresia/tracheo-esophageal fistula. *Prenat Diagn* 2008; 28: 667–675
- 16 Sase M, Asada H, Okuda M et al. Fetal gastric size in normal and abnormal pregnancies. *Ultrasound Obstet Gynecol* 2002; 19: 467–470

- 17 Choudhry M, Boyd PA, Chamberlain PF et al. Prenatal diagnosis of tracheo-oesophageal fistula and oesophageal atresia. *Prenat Diagn* 2007; 27: 608–610
- 18 Stringer MD, McKenna KM, Goldstein RB et al. Prenatal diagnosis of esophageal atresia. *J Pediatr Surg* 1995; 30: 1258–1263
- 19 Ethun CG, Fallon SC, Cassidy CI et al. Fetal MRI improves diagnostic accuracy in patients referred to a fetal center for suspected esophageal atresia. *J Pediatr Surg* 2014; 49: 712–715
- 20 Kalache KD, Wauer R, Mau H et al. Prognostic significance of the pouch sign in fetuses with prenatally diagnosed esophageal atresia. *Am J Obstet Gynecol* 2000; 182: 978–981
- 21 Yagel S, Sonigo P, Rousseau V et al. Esophageal atresia diagnosed with three-dimensional ultrasonography. *Ultrasound Obstet Gynecol* 2005; 26: 307–308
- 22 Solt I, Rotmensch S, Bronshtein M. The esophageal “pouch sign”: a benign transient finding. *Prenat Diagn* 2010; 30: 845–848
- 23 Brugger PC, Weber M, Prayer D. Magnetic resonance imaging of the normal fetal esophagus. *Ultrasound Obstet Gynecol* 2011; 38: 568–574
- 24 Malinger G, Levine A, Rotmensch S. The fetal esophagus: anatomical and physiological ultrasonographic characterization using a high-resolution linear transducer. *Ultrasound Obstet Gynecol* 2004; 24: 500–505
- 25 Develay-Morice J-E, Rathat G, Duyme M et al. Ultrasonography of fetal esophagus: healthy appearance and prenatal diagnosis of a case of esophagus atresia with esotracheal fistula. *Gynecol Obstet Fertil* 2007; 35: 249–257
- 26 Garabedian C, Verpillat P, Czerkiewicz I et al. Does a combination of ultrasound, MRI, and biochemical amniotic fluid analysis improve prenatal diagnosis of esophageal atresia? *Prenat Diagn* 2014; 34: 839–842
- 27 Kusanovic JP, Nien JK, Gonçalves LF et al. The use of inversion mode and 3D manual segmentation in volume measurement of fetal fluid-filled structures: comparison with Virtual Organ Computer-aided Analysis (VOCAL). *Ultrasound Obstet Gynecol* 2008; 31: 177–186
- 28 Ioannou C, Sarris I, Salomon LJ et al. A review of fetal volumetry: the need for standardization and definitions in measurement methodology. *Ultrasound Obstet Gynecol* 2011; 38: 613–619
- 29 Czerkiewicz I, Dreux S, Beckmezian A et al. Biochemical amniotic fluid pattern for prenatal diagnosis of esophageal atresia. *Pediatr Res* 2011; 70: 199–202
- 30 Muller C, Czerkiewicz I, Guimiot F et al. Specific biochemical amniotic fluid pattern of fetal isolated esophageal atresia. *Pediatr Res* 2013; 74: 601–605
- 31 Sase M, Miwa I, Sumie M et al. Gastric emptying cycles in the human fetus. *Am J Obstet Gynecol* 2005; 193: 1000–1004
